# Supplementary material for: Differential gene responses in the embryo of the green mussel Perna viridis exposed to dichlorodiphenyltrichloroethane (DDT)
Source: Royal Society of Chemistry journal article supplement (doi:10.1039/c7tx00087a), 2017-01-01
Supplement: c7tx00087a1.pdf [file c7tx00087a1.pdf]

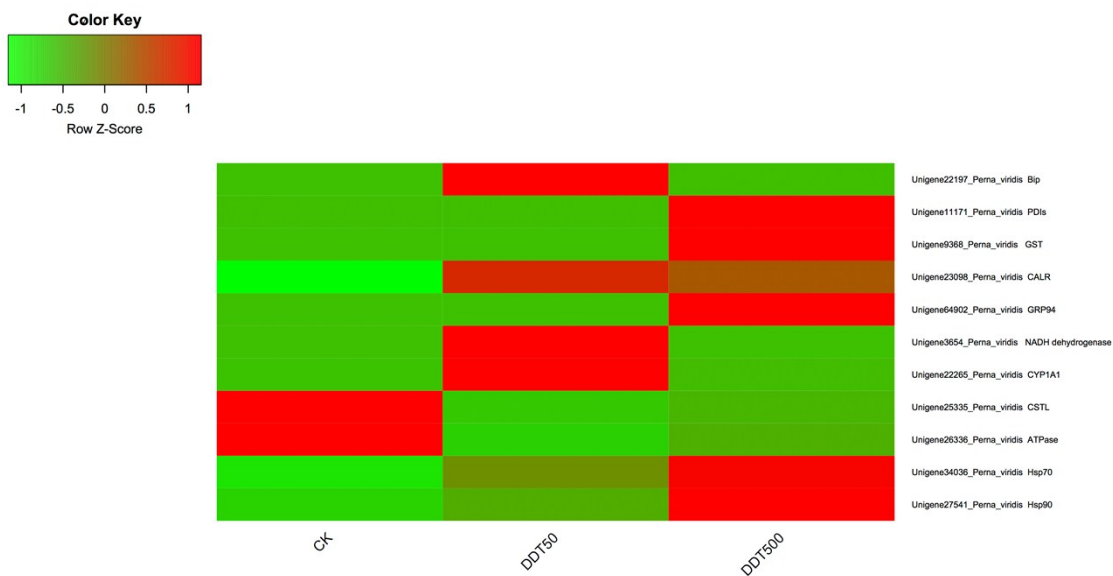

**Supplementary Material 1.** The expression modes of DGEs were associated with the oxidative stress, detoxification and immune system among the three treatments.

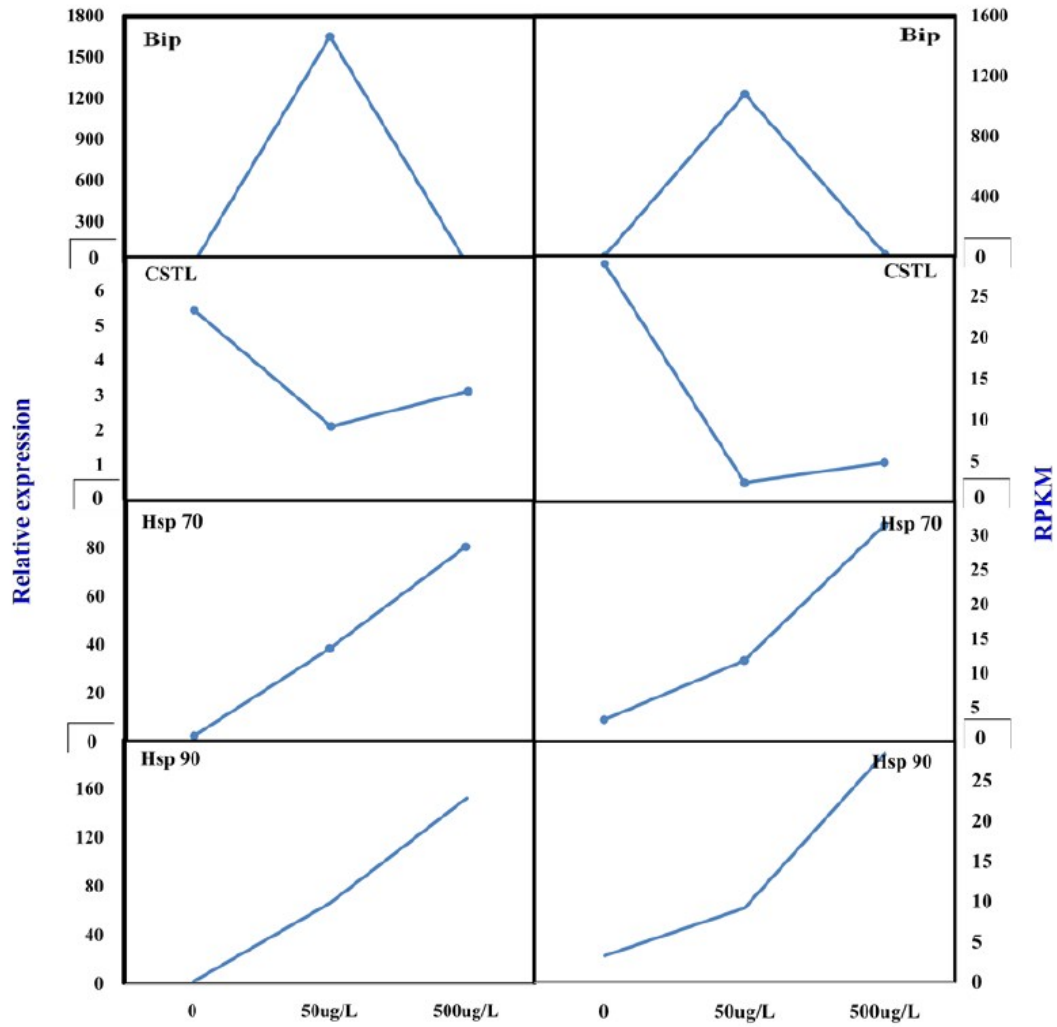

**Supplementary Material 2.** There were similar expression trends between RNA-seq data and qPCR results.

The left side is the relative expression of the four genes, and the right side is the RPKM value of the four genes.
